# Supplementary material for: N-Methylpyrrolidinium hydrogen tartrate (NMPHT): an above-room-temperature order–disorder molecular switchable dielectric material
Source: Royal Society of Chemistry journal article supplement (doi:10.1039/c7ra00689f), 2017-01-01
Supplement: c7ra00689f1.pdf [file c7ra00689f1.pdf]

**Electronic Supplementary Material (ESI) for RSC Advances.**

**Supporting Information**

***N*-Methylpyrrolidinium Hydrogen Tartrate (NMPHT): An Above-Room-Temperature Order–  
Disorder Molecular Switchable Dielectric Material**

Aurang Zeb,<sup>a, b</sup> Tariq Khan,<sup>a, b</sup> Muhammad Adnan Asghar,<sup>a, b</sup> Zhihua Sun,<sup>\* b</sup> Zhenyue Wu,<sup>a, b</sup>  
Sangen Zhao,<sup>b</sup> and Junhua Luo <sup>\* a, b</sup>

- a. State Key Laboratory of Structural Chemistry, Fujian Institute of Research on the Structure of Matter, Chinese Academy of Sciences (CAS), Fuzhou 350002, P. R. China  
b. Universities of the Chinese Academy of Sciences (UCAS), Beijing 100039, P. R. China

\*Correspondence: [sunzhihua@fjirsm.ac.cn](mailto:sunzhihua@fjirsm.ac.cn) and [jhluo@fjirsm.ac.cn](mailto:jhluo@fjirsm.ac.cn)

**Table of Contents:**

**Figure S1.** Powder X-ray diffraction pattern of **NMPHT**.

**Figure S2.** IR spectrum of **NMPHT**.

**Figure S3.** DSC curves of **NMPHT** at different scanning rates (2 K/min, 5 K/min, and 10 K/min).

**Figure S4.** Differential thermal analysis (DTA) and Thermo-Gravimetric (TG) curves of **NMPHT**.

**Figure S5.** The crystal packing views of **NMPHT** along the *c*-axis at (a) LTP, and (b) HTP.

**Figure S6.** NMP cation and tartrate anion with thermal ellipsoidal view at (a) LTP, and (b) HTP.

**Figure S7.** Temperature dependent cycle of dielectric constant of **NMPHT** at 1 MHz.

**Table S1.** Crystal data and structure refinement of **NMPHT** at 330 K and 260 K, respectively.

**Calculation of  $\Delta S$  and  $N$  for NMPHT**

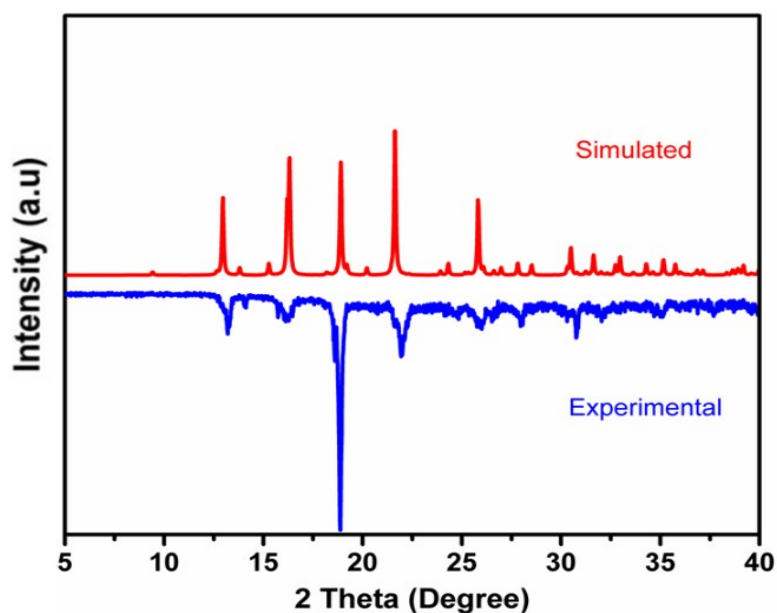

**Figure S1.** Experimental and simulated PXRD Patterns of **NMPHT**, verifying the phase purity.

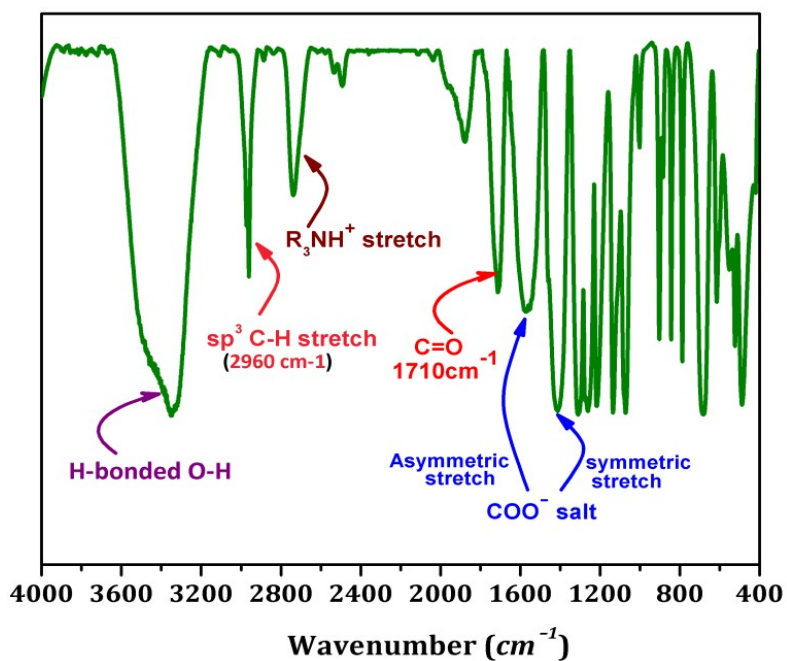

**Figure S2:** IR Spectrum of **NMPHT**, showing both the carboxylate and carboxylic acid groups.

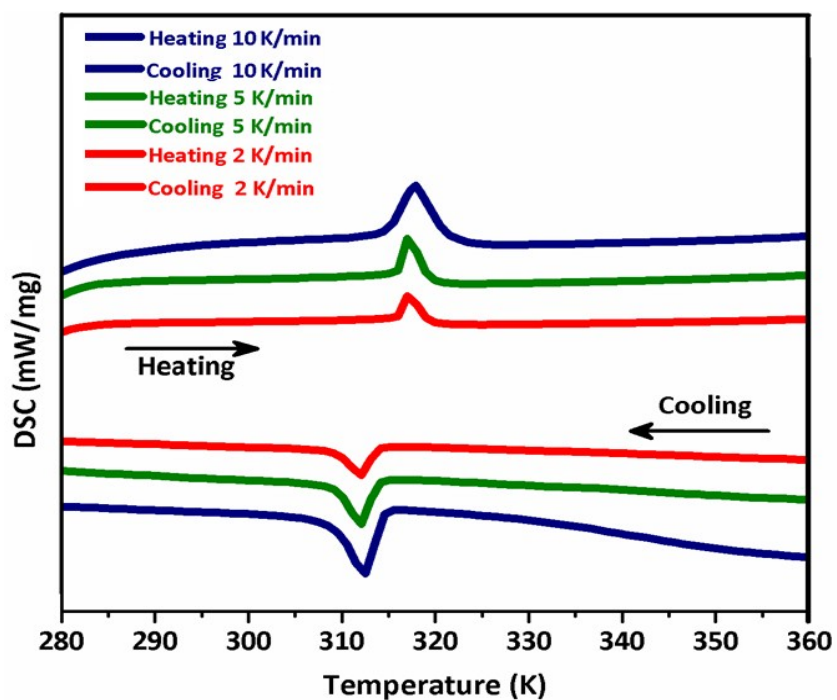

**Figure S3.** DSC curves of **NMPHT** at different scanning rates (2 K/min, 5 K/min, and 10 K/min).

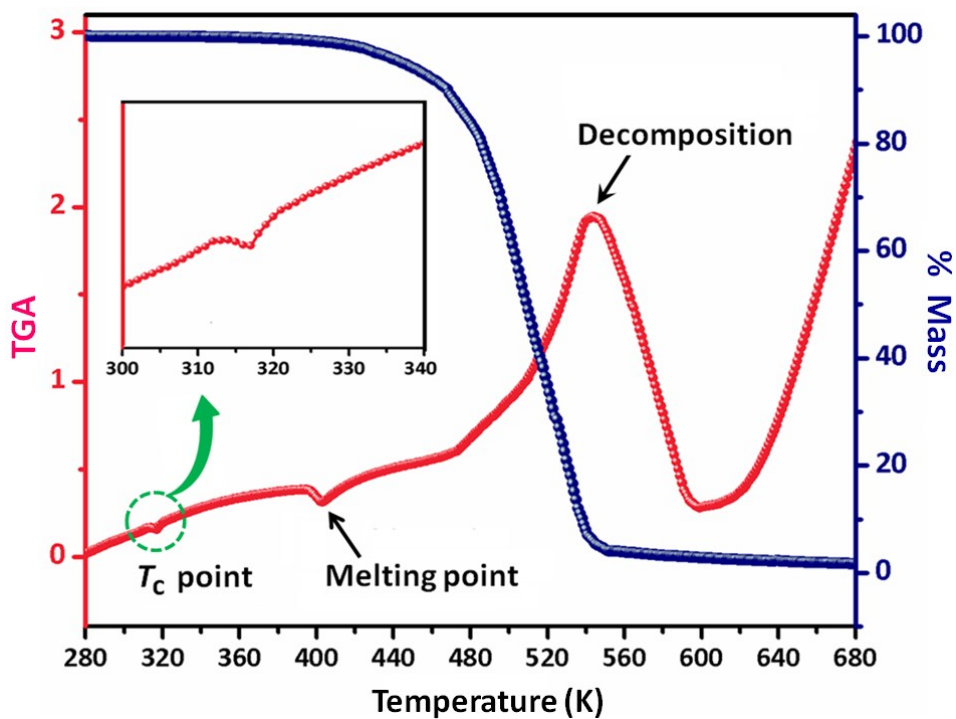

**Figure S4.** Differential thermal analysis (DTA) and Thermo-Gravimetric (TG) curves of **NMPHT**. The  $T_c$  point appears as a small protuberance, represented on the left side.

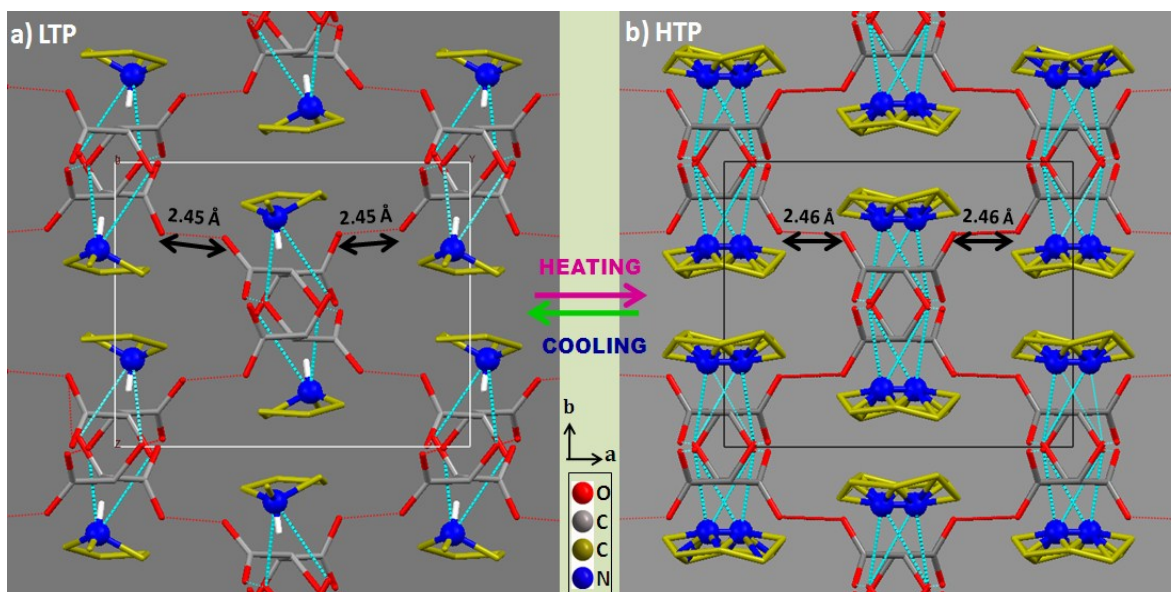

**Figure S5:** The packing views of **NMPHT** along the c-axis at (a) LTP and (b) HTP. Carbon-bonded H-atoms are omitted for clarity. The hydrogen bonds are represented as dashed lines.

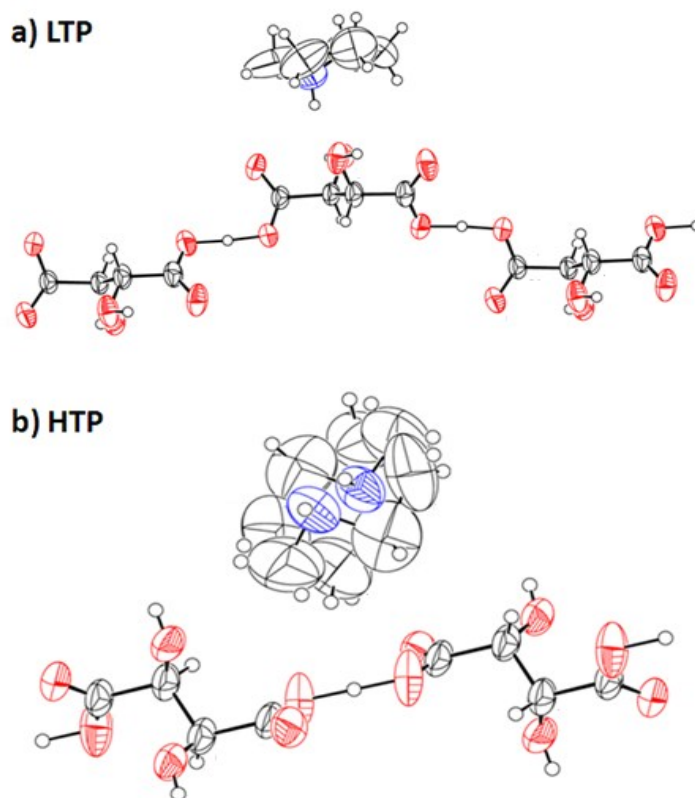

**Figure S6.** Thermal ellipsoidal view of **NMPHT** at (a) LTP and (b) at HTP.

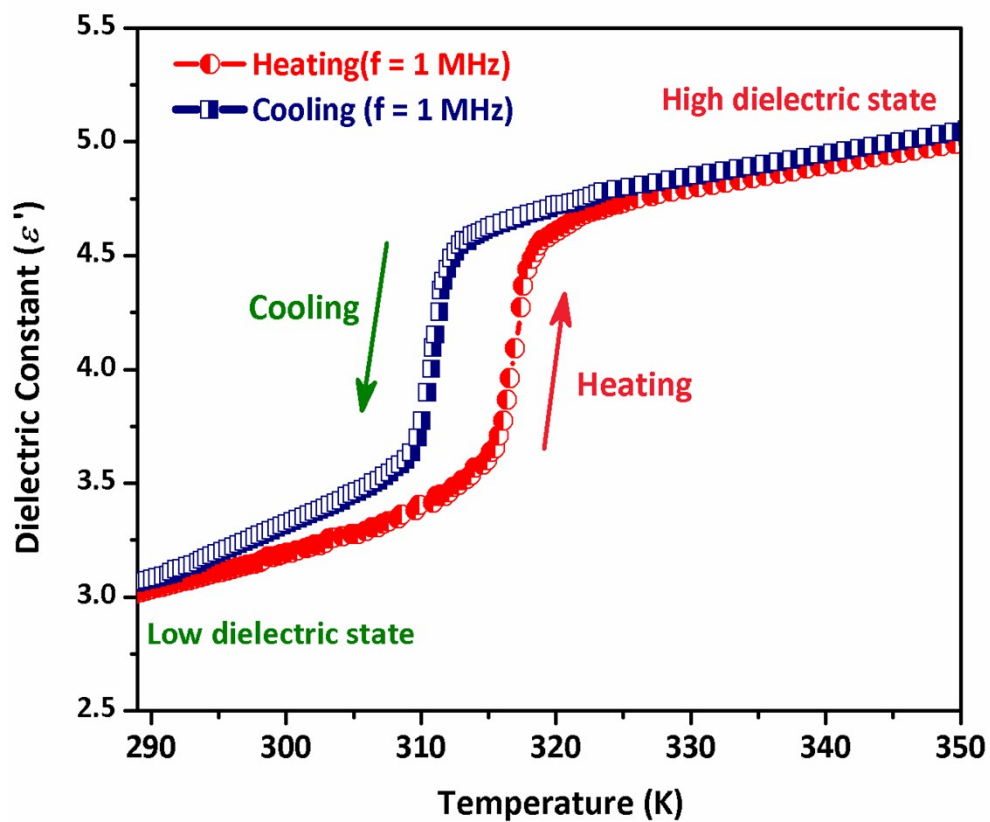

**Figure S7.** Temperature dependent cycle of dielectric constant of **NMPHT** at 1 MHz, showing the reversible dielectric switching between high and low dielectric states.

**Table S1:** The SCXRD data and structure refinement details of **NMPHT** at 330 and 260 K.

|                                                         |                                                                                                                                           |                                                                                                                                            |
|---------------------------------------------------------|-------------------------------------------------------------------------------------------------------------------------------------------|--------------------------------------------------------------------------------------------------------------------------------------------|
| Temperature (K)                                         | 330K, Cu-K $\alpha$                                                                                                                       | 260K, Cu-K $\alpha$                                                                                                                        |
| Sum formula                                             | C <sub>9</sub> H <sub>17</sub> N <sub>1</sub> O <sub>6</sub>                                                                              | C <sub>9</sub> H <sub>17</sub> N <sub>1</sub> O <sub>6</sub>                                                                               |
| Moiety formula                                          | C <sub>4</sub> H <sub>5</sub> O <sub>6</sub> , C <sub>5</sub> H <sub>12</sub> N                                                           | C <sub>4</sub> H <sub>5</sub> O <sub>6</sub> , C <sub>5</sub> H <sub>12</sub> N                                                            |
| Formula Weight                                          | 235.24                                                                                                                                    | 235.24                                                                                                                                     |
| Crystal system                                          | Monoclinic                                                                                                                                | Monoclinic                                                                                                                                 |
| Space group                                             | <i>C</i> 2/ <i>c</i>                                                                                                                      | <i>P</i> 2 <sub>1</sub> / <i>n</i>                                                                                                         |
| Cell parameters                                         | <i>a</i> = 11.7014(5) Å<br><i>b</i> = 8.7644(3) Å<br><i>c</i> = 12.0457(3) Å<br>$\alpha$ = 90°<br>$\beta$ = 107.298(4)°<br>$\gamma$ = 90° | <i>a</i> = 11.3346(4) Å<br><i>b</i> = 8.7794(3) Å<br><i>c</i> = 12.0991 (4) Å<br>$\alpha$ = 90°<br>$\beta$ = 106.683(4)°<br>$\gamma$ = 90° |
| Volume (Å <sup>3</sup> )                                | 1179.48(8)                                                                                                                                | 1153.32(7)                                                                                                                                 |
| <i>Z</i>                                                | 4                                                                                                                                         | 4                                                                                                                                          |
| <i>D</i> <sub>calcd.</sub> (g/cm <sup>3</sup> )         | 1.325                                                                                                                                     | 1.355                                                                                                                                      |
| <i>F</i> (000)                                          | 504.0                                                                                                                                     | 504.0                                                                                                                                      |
| Theta range (°)                                         | 3.8250 – 73.0240                                                                                                                          | 4.6870 – 73.3100                                                                                                                           |
| Completeness                                            | 99.4%                                                                                                                                     | 99.6%                                                                                                                                      |
| GOF                                                     | 1.045                                                                                                                                     | 1.073                                                                                                                                      |
| <i>R</i> <sub>1</sub> [on $F_o^2$ / $I > 2\sigma(I)$ ]  | 0.0764(792)                                                                                                                               | 0.0802(1699)                                                                                                                               |
| <i>wR</i> <sub>2</sub> [on $F_o^2$ / $I > 2\sigma(I)$ ] | 0.2587(1035)                                                                                                                              | 0.2435(2034)                                                                                                                               |

$$\alpha R_1 = \sum ||F_o| - |F_c|| / \sum |F_o|, wR_2 = [\sum (|F_o|^2 - |F_c|^2) / \sum |F_o|^2]^{1/2}$$

### Calculation of ' $\Delta S$ ' and ' $N$ ' for NMPHT:

According to Boltzmann equation:

$$\Delta S = nR \ln N$$

Where;

$\Delta S$  = entropy change,

$R$  = the universal gas constant,

$n$  = the number of guest molecules per mole ( $n = 1$ , here), and

$N$  = the number of possible orientations for the disordered system.

The  $\Delta S$  and  $N$  values on the heating process of **NMPHT** are calculated as follows: <sup>[1]</sup>

$$\Delta S = \int_{T_1}^{T_2} \frac{Q}{T} dT$$

$$\Delta S \cong \frac{\Delta H}{T_c}$$

For 1 mole;

$$\Delta S = \frac{9.828 \text{ J g}^{-1} \times 235.24 \text{ g mol}^{-1}}{317.5 \text{ K}} \quad (\text{where; } 235.24 \text{ g mol}^{-1} \text{ is the molecular mass of NMPHT})$$

$$\Delta S = \frac{2311.93 \text{ J mol}^{-1}}{317.5 \text{ K}}$$

$$\Delta S = 7.281 \text{ J mol}^{-1} \text{ K}^{-1}$$

$$\Delta S = R \ln N$$

$$N = e^{\left(\frac{\Delta S}{R}\right)}$$

$$N = e^{\left(\frac{7.281 \text{ J mol}^{-1} \text{ K}^{-1}}{8.314 \text{ J mol}^{-1} \text{ K}^{-1}}\right)}$$

$$N = 2.40$$

**Reference:**

1. Y.-Z. Tang, Z.-F. Gu, J.-B. Xiong, J.-X. Gao, Y. Liu, B. Wang, Y.-H. Tan and Q. Xu, *Chem. Mater.*, 2016, **28**, 4476–4482.
